# Supplementary material for: Association of PNC, BC, and PM2.5 Measured at a Central Monitoring Site with Blood Pressure in a Predominantly Near Highway Population
Source: PubMed Central journal article supplement (PMC4377931; doi:10.3390/ijerph120302765), 2015-03-03
Supplement: ijerph-12-02765-s001.pdf [file ijerph-12-02765-s001.pdf]

## Association of PNC, BC, and PM<sub>2.5</sub> Measured at a Central Monitoring Site with Blood Pressure in a Predominantly Near Highway Population

**Table S1.** Correlation matrix of 24-h PNC, PM<sub>2.5</sub>, BC pollutant, temperature, and quadratic-centering transformed temperature measure ( $n = 331$  at both visits).

| Exposure Variables                          | 24-h PNC | 24-h PM <sub>2.5</sub> | 24-h BC | 24-h Temperature | Quadratic-Centering Transformed Temperature |
|---------------------------------------------|----------|------------------------|---------|------------------|---------------------------------------------|
| PNC                                         | 1.0000   |                        |         |                  |                                             |
| PM <sub>2.5</sub>                           | -0.0136  | 1.0000                 |         |                  |                                             |
| BC                                          | 0.3002   | 0.7951                 | 1.0000  |                  |                                             |
| 24-h Temperature                            | -0.7547  | 0.0305                 | -0.1574 | 1.0000           |                                             |
| Quadratic-Centering Transformed Temperature | -0.1570  | 0.2627                 | 0.1336  | 0.0252           | 1.0000                                      |

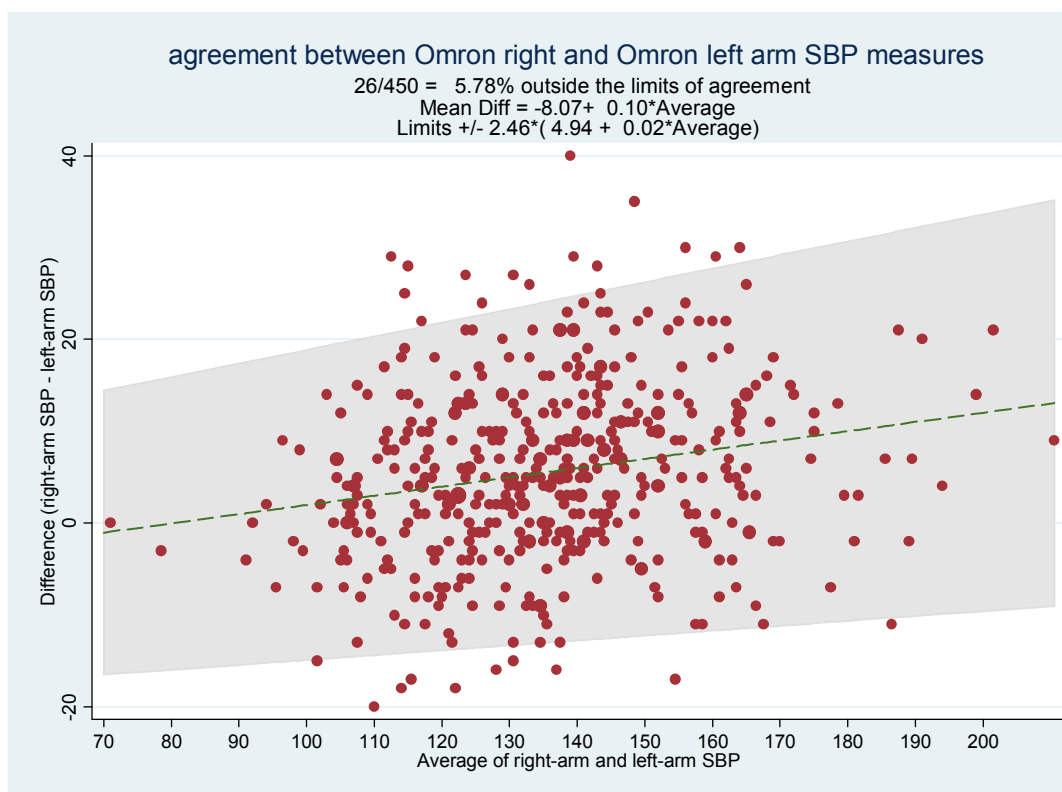

**Figure S1.** Bland-Altman Limits of Agreement analysis for the agreements between Omron right and left arm SBP measures.

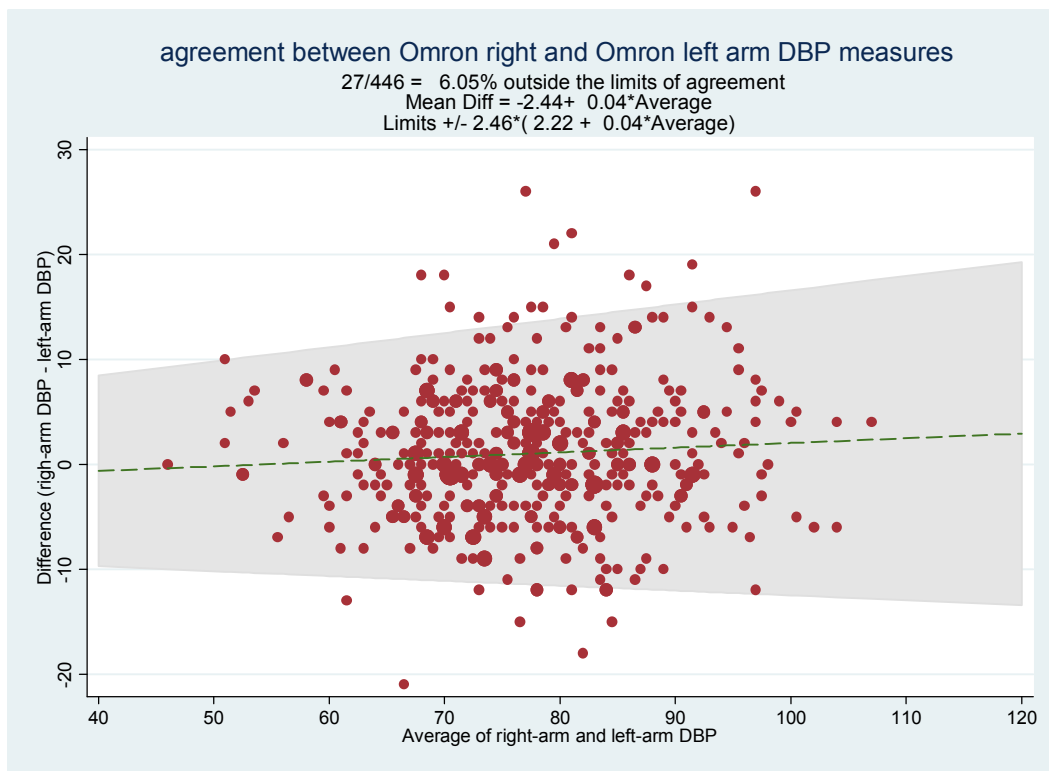

**Figure S2.** Bland-Altman Limits of Agreement analysis for the agreements between Omron right and left arm DBP measures.

**Tables S2.** Sensitivity analysis (number of observations = 302 in 190 people) using natural log of BP variables as the dependent variables.

| Air Pollutant                                | SBP     |           |          | DBP     |           |          | PP        |           |          |
|----------------------------------------------|---------|-----------|----------|---------|-----------|----------|-----------|-----------|----------|
|                                              | R       | Robust SE | <i>p</i> | R       | Robust SE | <i>p</i> | R         | Robust SE | <i>p</i> |
| 24 h PNC (10,000 particles/cm <sup>3</sup> ) | 0.018   | 0.013     | 0.18     | 0.028   | 0.028     | 0.05     | 0.0000004 | 0.004     | 0.85     |
| 24 h PM2.5 (ug/m <sup>3</sup> )              | -0.0016 | 0.0012    | 0.18     | -0.0021 | 0.0015    | 0.15     | -0.001    | 0.0021    | 0.62     |
| 24 h BC (μg/m <sup>3</sup> )                 | -0.01   | 0.02      | 0.51     | -0.02   | 0.02      | 0.37     | -0.001    | 0.03      | 0.97     |

Notes: Covariates in the model: Temperature (quadratic term of the centering temperature variable), random/convenience sample, highway proximity, age, gender, race, obesity status, hypertension medication use, smoking status, education status, seasonal variation (sin and cos), weekday or weekends, and clinic date. Beta coefficient (R) for each pollutant can be interpreted as % change per unit increase in the pollutant concentration as indicated in the table. \* *p* < 0.05; \*\* *p* < 0.01.

**Tables S3.** Assessment of potential confounding by temperature in our PNC, PM2.5, or BC models.

| Air Pollutant                                | Model | With Temperature Covariate |         | Without Temperature Covariate |         | % Change in R |
|----------------------------------------------|-------|----------------------------|---------|-------------------------------|---------|---------------|
|                                              |       | R                          | p       | R                             | p       |               |
| 24 h PNC (10,000 particles/cm <sup>3</sup> ) | SBP   | 2.20                       | 0.226   | 2.24                          | 0.213   | 2%            |
|                                              | DBP   | 2.41                       | 0.030 * | 2.32                          | 0.038 * | -4%           |
|                                              | PP    | -0.158                     | 0.906   | 0.001                         | 0.994   | -94%          |
| 24 h PM2.5 (ug/m <sup>3</sup> )              | SBP   | -0.211                     | 0.195   | -0.315                        | 0.039 * | 49%           |
|                                              | DBP   | -0.143                     | 0.213   | -0.172                        | 0.109   | 21%           |
|                                              | PP    | -0.063                     | 0.583   | -0.138                        | 0.206   | 121%          |
| 24 h BC (ug/m <sup>3</sup> )                 | SBP   | -1.333                     | 0.584   | -2.364                        | 0.321   | -197%         |
|                                              | DBP   | -1.257                     | 0.458   | -1.594                        | 0.342   | 27%           |
|                                              | PP    | -0.033                     | 0.985   | -0.745                        | 0.668   | 2160%         |

Notes: Other covariates in the model: random/convenience sample, highway proximity, age, gender, race, obesity status, hypertension medication use, smoking status, education status, seasonal variation (sin and cos), weekday or weekends, and clinic date. \*  $p < 0.05$ .

**Tables S4.** Sensitivity analysis using different arm BP measurements (number of observations = 300 in 190 people).

| (a) First Right-arm PNC Model                |       |           |      |       |           |      |       |           |      |
|----------------------------------------------|-------|-----------|------|-------|-----------|------|-------|-----------|------|
|                                              | SBP   |           |      | DBP   |           |      | PP    |           |      |
|                                              | R     | Robust SE | p    | R     | Robust SE | p    | R     | Robust SE | p    |
| 24 h PNC (10,000 particles/cm <sup>3</sup> ) | 3.20  | 2.15      | 0.14 | 2.45  | 1.34      | 0.07 | -1.58 | 1.34      | 0.91 |
| PM2.5 (ug/m <sup>3</sup> )                   | -0.30 | 0.22      | 0.17 | -0.14 | 0.16      | 0.38 | -0.10 | 0.12      | 0.40 |
| BC (ug/m <sup>3</sup> )                      | -6.51 | 2.43      | 0.10 | -2.38 | 1.57      | 0.13 | -2.88 | 1.52      | 0.60 |
| (b) Repeated Right Arm PNC Model             |       |           |      |       |           |      |       |           |      |
|                                              | SBP   |           |      | DBP   |           |      | PP    |           |      |
|                                              | R     | Robust SE | p    | R     | Robust SE | p    | R     | Robust SE | p    |
| 24 h PNC (10,000 particles/cm <sup>3</sup> ) | 4.05  | 2.07      | 0.05 | 2.33  | 1.34      | 0.08 | -0.16 | 1.34      | 0.91 |
| 24 h PM2.5 (ug/m <sup>3</sup> )              | -0.28 | 0.22      | 0.19 | -0.24 | 0.15      | 0.12 | -0.10 | 0.12      | 0.40 |
| 24 h BC (ug/m <sup>3</sup> )                 | -1.88 | 3.51      | 0.59 | -2.57 | 2.29      | 0.26 | -2.88 | 1.52      | 0.06 |

Table S4. Cont.

| (c) Left-arm Only PNC Model                  |       |           |          |       |           |          |      |           |          |
|----------------------------------------------|-------|-----------|----------|-------|-----------|----------|------|-----------|----------|
|                                              | SBP   |           |          | DBP   |           |          | PP   |           |          |
|                                              | R     | Robust SE | <i>p</i> | R     | Robust SE | <i>p</i> | R    | Robust SE | <i>p</i> |
| 24 h PNC (10,000 particles/cm <sup>3</sup> ) | 1.23  | 1.81      | 0.50     | 2.26  | 1.21      | 0.06     | 1.00 | 1.36      | 0.46     |
| 24 h PM <sub>2.5</sub> (ug/m <sup>3</sup> )  | -0.08 | 0.16      | 0.63     | -0.08 | 0.12      | 0.53     | 0.01 | 0.12      | 0.95     |
| 24 h BC (ug/m <sup>3</sup> )                 | 1.41  | 2.34      | 0.55     | -0.09 | 1.77      | 0.96     | 1.71 | 2.02      | 0.40     |

Notes: Covariates in the model: Temperature (quadratic term of the centering temperature variable), random/convenience sample, highway proximity, age, gender, race, obesity status, hypertension medication use, smoking status, education status, seasonal variation (sin and cos), weekday or weekends, and clinic date.

© 2015 by the authors; licensee MDPI, Basel, Switzerland. This article is an open access article distributed under the terms and conditions of the Creative Commons Attribution license (<http://creativecommons.org/licenses/by/4.0/>).
